# Supplementary material
Source: PubMed Central journal article supplement (PMC3071709)
Supplement: NIHMS251183-supplement-Supp_Figure_S1-_S7___Supp_Table_S1-S2.pdf [file NIHMS251183-supplement-Supp_Figure_S1-_S7___Supp_Table_S1-S2.pdf]

1 **Figure S1**

2 **Secondary structure prediction of FasX RNA using a covariance analysis approach.**

3 (A) To enhance the possibility of correct secondary structure prediction via *in silico*  
4 analysis we utilized the program RNAalifold, which uses covariance analysis to predict  
5 secondary structure (Hofacker *et al.*, 2002). Our input FasX RNA sequences were the  
6 four FasX molecules shown in figure 1B, which are representative of FasX from four  
7 different streptococcal species. The two conserved regions of FasX are highlighted with  
8 numbered green bars. (B) GAS FasX secondary structure as predicted by the  
9 bioinformatic program RNAfold (Hofacker, 2003). Note the high level of similarity  
10 between the predicted secondary structures using RNAalifold and RNAfold. The two  
11 conserved regions of FasX are highlighted with numbered green bars. We will use the  
12 secondary structure predicted by RNAfold throughout the rest of the manuscript.

13

14 **Figure S2**

15 **Southern blot confirmation of *fasX* mutation in strain 2221ΔFasX.** A Southern blot  
16 was constructed using *EcoRV*-digested genomic DNAs from parental strain MGAS2221  
17 and putative isogenic *fasX* mutant 2221ΔFasX. The probed blot generated bands of  
18 expected size for both the wild-type (~1.6 kb) and mutant (~5.8 kb) strains.

19

20 **Figure S3**

21 **Nucleotide variation between GAS and *S. zooepidemicus* *fasX* alleles.** Nucleotides  
22 that differ between the MGAS2221 and *S. zooepidemicus* FasX molecules are highlighted

1 with blue (SNPs) or purple (additions or deletions) text. The two conserved regions of  
2 FasX are highlighted with numbered green bars.

3

#### 4 **Figure S4**

5 **The FASX RNA transcript, and not a protein encoded within the transcript, is the**  
6 **regulatory molecule.** (A) FASX nucleotide sequence showing the locations of the five

7 ORFs (colored lines; A-E). The three nucleotides in bolded italics are those deleted in  
8 the plasmids p $\Delta$ 1, p $\Delta$ 2, and p $\Delta$ 3. Inverted arrows highlight the terminator hairpin. (B)

9 The nucleotide and corresponding protein sequences of ORF A are shown at the top. At  
10 the bottom are the mutant ORF A nucleotide and protein sequences from the *fasX* allele  
11 that is present in plasmid p $\Delta$ 1. Black shading highlights nucleotide sequence identity

12 between the two ORF A sequences, with the white gap between shading highlighting the  
13 deleted base in plasmid p $\Delta$ 1. The start (green) and stop (red) codons are highlighted. (C)

14 Indirect assay of SKA activity showing that none of the *fasX* mutations created in  
15 plasmids p $\Delta$ 1-3 prevented complementation of isogenic mutant strain 2221 $\Delta$ FASX. The  
16 experiment was performed in triplicate with mean values ( $\pm$  standard deviation) shown.

17

18

#### 19 **Figure S5**

20 **Construction of plasmid-encoded mutant *fasX* alleles.** Shown is the overlap PCR  
21 mutagenesis protocol used to create plasmid-encoded mutant alleles of *fasX*. The

22 sequences of the primers used to create each mutant allele are listed in table S2.

23

1 **Figure S6**

2 **Inhibition of CvfA and PNPase ribonuclease activity is not the mechanism by which**

3 **FasX enhances *ska* mRNA stability.** (A) Quantitative RT-PCR analysis of *ska* (blue

4 lines) and *proS* (red lines) mRNA levels over time after addition of rifampicin to cultures

5 of the strains indicated. Note that strains ending “*cvfA*::pKO” have a plasmid integrated

6 into the *cvfA* gene that disrupts this gene, while strains ending “*cvfA*::pOK” have a

7 plasmid inserted into the *cvfA* gene that does not disrupt this gene. Note that the stability

8 of *proS* mRNA, but not *ska* mRNA, is influenced by the presence/absence of an intact

9 *cvfA* gene. (B) Western blot analysis of SKA protein levels in the culture supernatants of

10 MGAS2221 and 2221 $\Delta$ FasX derivatives containing disrupted or non-disrupted *cvfA*

11 genes. The non-FasX regulated secreted protein Spd3 was assayed for use as a loading

12 control. (C) Western blot analysis of SKA protein levels in the culture supernatants of

13 MGAS2221 and 2221 $\Delta$ FasX derivatives containing a disrupted *pnpA* gene or empty

14 vector. The non-FasX regulated secreted protein Spd3 was assayed for use as a loading

15 control.

16

17 **Figure S7**

18 **Method used to determine the *ska* transcriptional start site.** The red block arrow

19 represents the *ska* mRNA with unknown 5' end. Small black arrows represent PCR

20 primers used in the protocol.

21

22

23

1

2 **References**

3

4 Hofacker, I. L., (2003) Vienna RNA secondary structure server. *Nucleic Acids Res* **31**:  
5 3429-3431.

6 Hofacker, I. L., M. Fekete & P. F. Stadler, (2002) Secondary structure prediction for  
7 aligned RNA sequences. *J Mol Biol* **319**: 1059-1066.

8

Figure S1

A

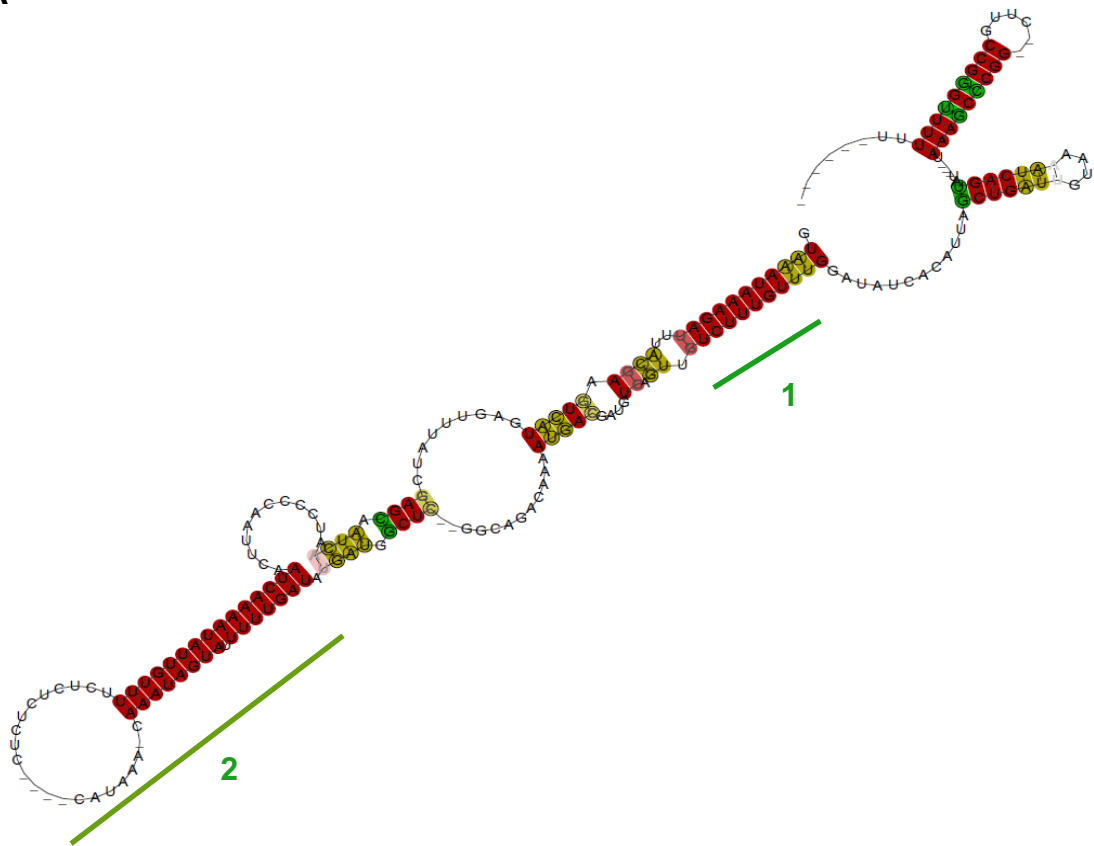

B

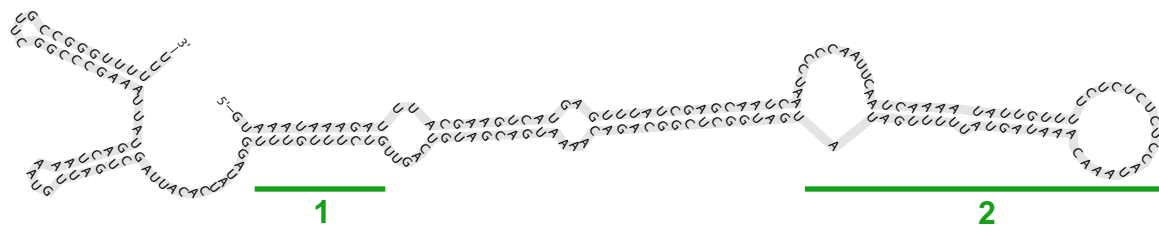

Figure S2

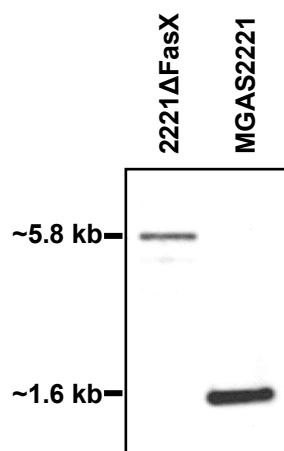

Figure S3

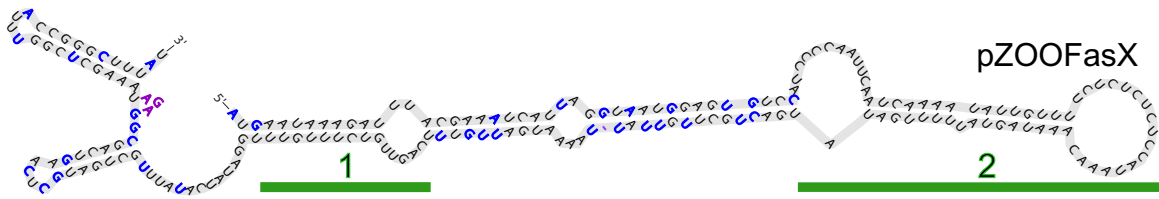

Figure S4

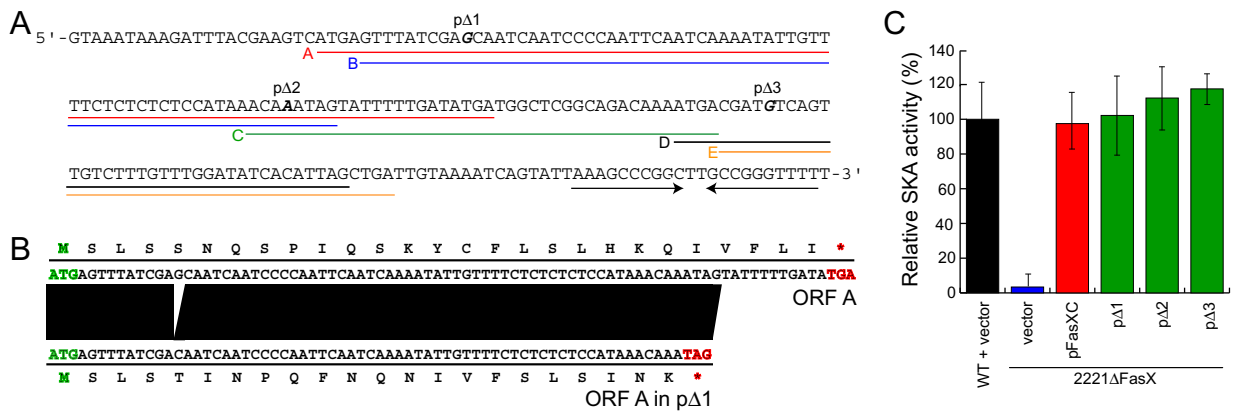



Figure S5

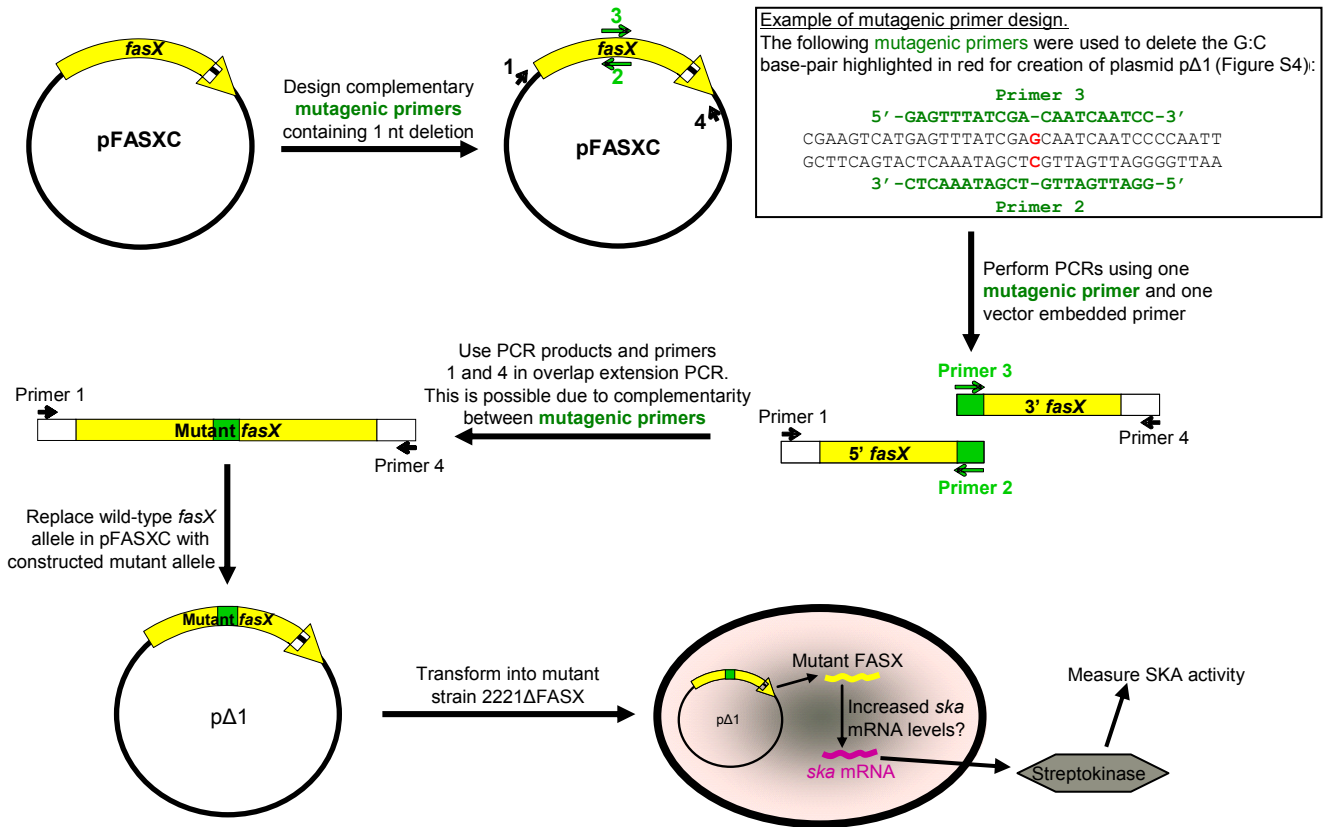

Figure S6

A

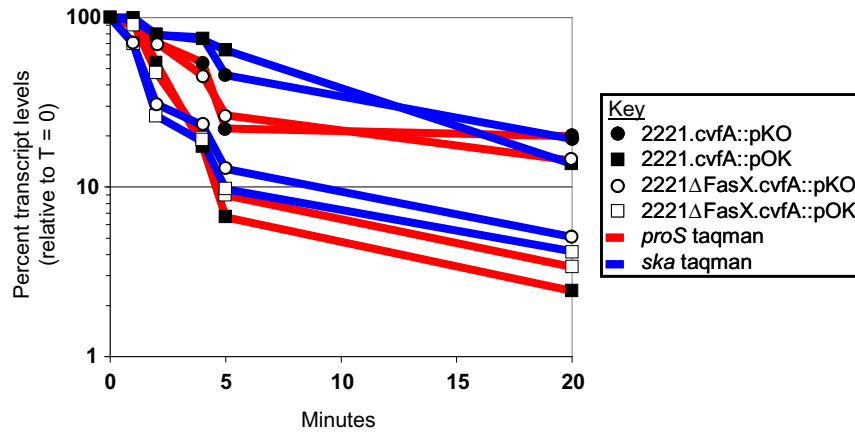

B

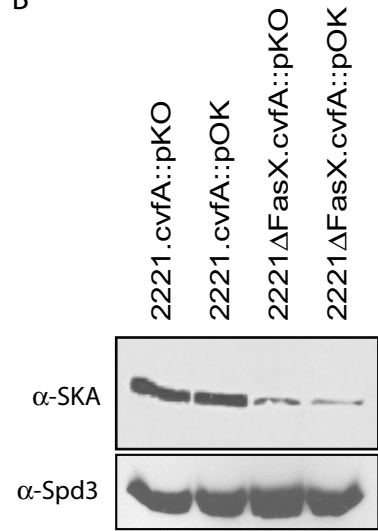

C

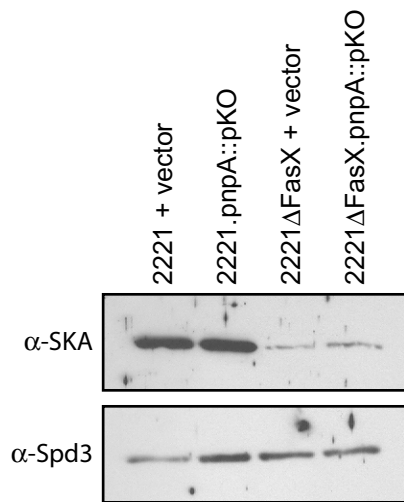

**Figure S7**

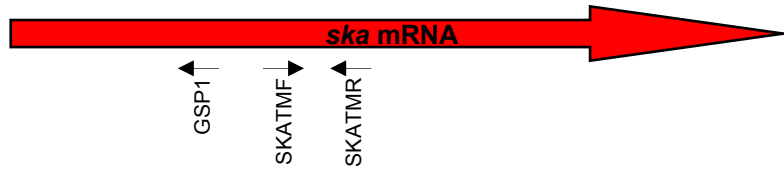

(A) Make cDNA using GAS total RNA and primer SKATMR.

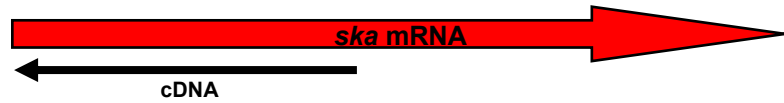

(B) Remove RNA and purify cDNA. Add 5' phosphate to cDNA using T4 polynucleotide kinase.

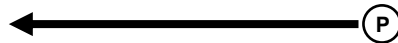

(C) Ligate cDNA to self (circularize) using T4 RNA ligase 1.

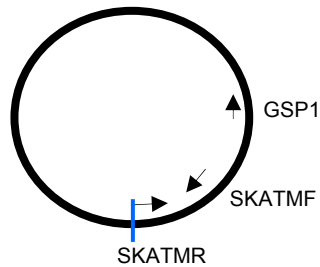

(D) PCR using primers SKATMF and GSP1 using the ligated cDNA as template.

(E) Gel extract PCR, TA-clone, transform *E. coli*, and sequence inserts from a dozen transformants.

**Table S1**

Serotype M1 GAS strains used in this study.

| Strain   | Location    | Year       | <i>emm</i> allele | Disease or source       | <i>fasX</i> SNPs |
|----------|-------------|------------|-------------------|-------------------------|------------------|
| MGAS2221 | Australia   | 1988       | 1                 | Scarlet fever           | REFERENCE        |
| MGAS5300 | W Finland   | 1988       | 1.2               | Throat                  | NONE             |
| MGAS5305 | N Finland   | 1988       | 1                 | Throat                  | NONE             |
| MGAS5307 | E Finland   | 1988       | 1                 | Blood                   | NONE             |
| MGAS2081 | New Zealand | 1989       | 1                 | Cellulitis              | NONE             |
| MGAS5316 | W Finland   | 1989       | 1                 | Blood                   | NONE             |
| MGAS5322 | E Finland   | 1989       | 1                 | Throat                  | NONE             |
| MGAS5337 | W Finland   | 1989       | 1                 | Pus                     | NONE             |
| MGAS5348 | C Finland   | 1989       | 1                 | Blood                   | NONE             |
| MGAS253  | California  | 1980s      | 1.3               | Invasive                | NONE             |
| MGAS571  | Montreal    | 1980s      | 1.3               | Scarlet fever           | NONE             |
| MGAS290  | Colorado    | Late 1980s | 1                 | Invasive                | NONE             |
| MGAS294  | Washington  | Late 1980s | 1                 | Invasive                | NONE             |
| MGAS313  | Wyoming     | Late 1980s | 1                 | STSS                    | NONE             |
| MGAS337  | New York    | Late 1980s | 1                 | Throat                  | NONE             |
| MGAS1284 | Denmark     | 1990       | 1                 | -                       | NONE             |
| MGAS1573 | Germany     | 1990       | 1                 | -                       | NONE             |
| MGAS5393 | C Finland   | 1990       | 1                 | Throat                  | NONE             |
| MGAS5411 | C Finland   | 1990       | 1                 | Blood                   | NONE             |
| MGAS5432 | W Finland   | 1991       | 1                 | Blood                   | NONE             |
| MGAS4943 | Ontario     | 1992       | 1                 | Bacteremia              | NONE             |
| MGAS5087 | Ontario     | 1993       | 1                 | Lower respiratory tract | NONE             |
| MGAS5171 | Ontario     | 1994       | 1                 | Necrotizing fasciitis   | NONE             |
| MGAS5459 | N Finland   | 1994       | 1                 | Throat                  | NONE             |
| MGAS5475 | N Finland   | 1994       | 1                 | Throat                  | NONE             |
| MGAS5508 | S Finland   | 1994       | 1                 | Pus                     | NONE             |
| MGAS3437 | Ontario     | 1995       | 1                 | Soft tissue             | NONE             |
| MGAS3680 | Virginia    | 1995       | 1                 | -                       | NONE             |
| MGAS5531 | E Finland   | 1995       | 1                 | Throat                  | NONE             |
| MGAS5579 | W Finland   | 1995       | 1                 | Pus                     | NONE             |
| MGAS6413 | Georgia     | 1995       | 1                 | Blood                   | NONE             |
| MGAS5005 | Ontario     | 1996       | 1                 | Cerebral spinal fluid   | NONE             |
| MGAS5669 | S Finland   | 1996       | 1                 | Pus                     | NONE             |
| MGAS5682 | S Finland   | 1996       | 1                 | Pus                     | NONE             |
| MGAS5690 | C Finland   | 1996       | 1                 | Blood                   | NONE             |
| MGAS6419 | Atlanta     | 1996       | 1                 | -                       | NONE             |
| MGAS6470 | Connecticut | 1996       | 1                 | -                       | NONE             |
| MGAS6499 | Connecticut | 1996       | 1                 | Blood                   | NONE             |
| MGAS5792 | W Finland   | 1997       | 1                 | Blood                   | NONE             |
| MGAS5804 | C Finland   | 1997       | 1                 | Blood                   | NONE             |
| MGAS6617 | Minnesota   | 1997       | 1                 | Blood                   | NONE             |
| MGAS6558 | Maryland    | 1998       | 1                 | -                       | NONE             |
| MGAS6700 | San         | 1998       | 1                 | -                       | NONE             |

|          |             |            |   |          |      |
|----------|-------------|------------|---|----------|------|
|          | Francisco   |            |   |          |      |
| MGAS6727 | E Finland   | 1998       | 1 | Blood    | NONE |
| MGAS6184 | Texas (TDH) | 1997-98    | 1 | Invasive | NONE |
| MGAS9127 | Alberta     | Late 1990s | 1 | Invasive | NONE |
| MGAS9138 | Alberta     | Late 1990s | 1 | Invasive | NONE |
| MGAS9144 | Alberta     | Late 1990s | 1 | Invasive | NONE |
| MGAS9150 | Alberta     | Late 1990s | 1 | Invasive | NONE |

**Table S2**

Primer and probe sequences.

| Name               | Sequence (5' - 3')                                        | Information                      |
|--------------------|-----------------------------------------------------------|----------------------------------|
| PROSTMF            | GCTGACCGCAAAGTGCAAA                                       | Taqman primer                    |
| PROSTMR            | TGACTCCTGTTCATATGGAAACCA                                  | Taqman primer                    |
| PROSTMP            | TACCAATGCCGTTGCAGGAGCTAACAA                               | Taqman probe                     |
| SKATMF             | CGGCTACTTTGAGGTCATTGATT                                   | Taqman primer                    |
| SKATMR             | CCGAACCATCTTTGTCAGCAA                                     | Taqman primer                    |
| SKATMP             | CAAGCGATGCAACCATTACTGATCGAAAC                             | Taqman probe                     |
| FASXTMF            | ATTTACGAAGTCATGAGTTTATCGAGC                               | Taqman primer                    |
| FASXTMR            | TGTCTGCCGAGCCATCATATC                                     | Taqman primer                    |
| FASXTMP            | CCCCAATTCAATCAAAATATTGTTTTCTCTCTCTCC                      | Taqman probe                     |
| FASXF              | GAAGTCATGAGTTTATCGAG                                      | Northern probe primer            |
| FASXR              | CAAACAAAGACAACACTGACATCG                                  | Northern probe primer            |
| 5SF                | GTTAAGTGACGATAGCCTAG                                      | Northern probe primer            |
| 5SR                | CTTAATACGACTCACTATAGGGAGCTAAGCGACTACCTTATCTC              | Northern probe primer            |
| FASXA              | TCGTGTGGATATAGCCAAACG                                     | Primer to KO <i>fasX</i>         |
| FASXB              | GTTATAGTTATTATAACATGTATTCATAA<br>TTATTATAGCGAAAAATG       | Primer to KO <i>fasX</i>         |
| FASXC              | CTATTTAAATAACAGATTAATAAATTATA<br>AGGGGTTTTTGGATAGGTAATAAC | Primer to KO <i>fasX</i>         |
| FASXD              | GGGGTAAGAGACTAGCATAAG                                     | Primer to KO <i>fasX</i>         |
| FASXE              | GAGACAGCCAAAGGCAGTAGACG                                   | Primer to KO <i>fasX</i>         |
| FASXF              | GGAATAAGGCAATCATAACTGG                                    | Primer to KO <i>fasX</i>         |
| FASXSF             | CATTTTTCGCTATAATAATTAGTGAATACA<br>TGTTATAATAACTATAAC      | Primer to KO <i>fasX</i>         |
| FASXSR             | GTATTTACCTATCAAAAACCCCTTATAAT<br>TTTTTAATCTGTTATTTAAATAG  | Primer to KO <i>fasX</i>         |
| COMPFA<br>S<br>F   | GCAGATCTCGAATTGATAAGAGTAAGCAG<br>C                        | Complementation primer           |
| COMPFA<br>S<br>R   | GCATGCATGACGTCAGCTACTTATCCC                               | Complementation primer           |
| DC123E<br>C<br>ORV | CCTTATTAACATTCAACAAC                                      | pDC123-embedded primer           |
| DC123B<br>G<br>LII | TATCATCCACTCAAGACTTTTGAC                                  | pDC123-embedded primer           |
| Δ20F               | GATTTACGAATCATGAGTTTATC                                   | Mutant <i>fasX</i> allele primer |
| Δ20R               | GATAAACTCATGATTCGTAAATC                                   | Mutant <i>fasX</i> allele primer |
| Δ26F               | CGAAGTCATGGTTTATCGAG                                      | Mutant <i>fasX</i> allele primer |
| Δ26R               | CTCGATAAACCATGACTTCG                                      | Mutant <i>fasX</i> allele primer |
| Δ36F               | GAGTTTATCGACAATCAATCC                                     | Mutant <i>fasX</i> allele primer |
| Δ36R               | GGATTGATTGTCGATAAACTC                                     | Mutant <i>fasX</i> allele primer |
| Δ46F               | CGAGCAATCAATCCCAATTCAATC                                  | Mutant <i>fasX</i> allele primer |
| Δ46R               | GATTGAATTGGGATTGATTGCTCG                                  | Mutant <i>fasX</i> allele primer |
| Δ61F               | CAATTCAATCAAATATTGTTTTCTC                                 | Mutant <i>fasX</i> allele primer |
| Δ61R               | GAGAAAACAATATTTGATTGAATTG                                 | Mutant <i>fasX</i> allele primer |
| Δ100F              | CAAATAGTATTTTTATATGATGGCTC                                | Mutant <i>fasX</i> allele primer |

|                 |                                                               |                                     |
|-----------------|---------------------------------------------------------------|-------------------------------------|
| Δ100R           | GAGCCATCATATAAAAATACTATTTG                                    | Mutant <i>fasX</i> allele primer    |
| Δ111F           | GATATGATGGCCGGCAGACAAAATG                                     | Mutant <i>fasX</i> allele primer    |
| Δ111R           | CATTTTGTCTGCCGGCCATCATATC                                     | Mutant <i>fasX</i> allele primer    |
| Δ121F           | CTCGGCAGACAAATGACGATGTC                                       | Mutant <i>fasX</i> allele primer    |
| Δ121R           | GACATCGTCATTTGTCTGCCGAG                                       | Mutant <i>fasX</i> allele primer    |
| Δ144F           | CAGTTGTCTTTTTGGATATCAC                                        | Mutant <i>fasX</i> allele primer    |
| Δ144R           | GTGATATCCAAAAAGACAACACTG                                      | Mutant <i>fasX</i> allele primer    |
| Δ10F            | TAGTGATAAATAAAATTTACGAAGTC                                    | Mutant <i>fasX</i> allele primer    |
| Δ10R            | GACTTCGTAAATTTTATTTACACTA                                     | Mutant <i>fasX</i> allele primer    |
| Δ15F            | GTAATAAAGATTTTGAAGTCATGAG                                     | Mutant <i>fasX</i> allele primer    |
| Δ15R            | CTCATGACTTCGAAATCTTTATTAC                                     | Mutant <i>fasX</i> allele primer    |
| Δ29F            | GAAGTCATGAGTTATCGAGCAATC                                      | Mutant <i>fasX</i> allele primer    |
| Δ29R            | GATTGCTCGATAACTCATGACTTC                                      | Mutant <i>fasX</i> allele primer    |
| Δ38F            | AGTTTATCGAGCATCAATCCCCA                                       | Mutant <i>fasX</i> allele primer    |
| Δ38R            | TGGGGATTGATGCTCGATAAACT                                       | Mutant <i>fasX</i> allele primer    |
| Δ42F            | TTTATCGAGCAATCATCCCAATTC                                      | Mutant <i>fasX</i> allele primer    |
| Δ42R            | GAATTGGGGATGATTGCTCGATAAA                                     | Mutant <i>fasX</i> allele primer    |
| Δ50F            | CAATCAATCCCCATTCAATCAA                                        | Mutant <i>fasX</i> allele primer    |
| Δ50R            | TTTGATTGAATGGGGATTGATTG                                       | Mutant <i>fasX</i> allele primer    |
| Δ54F            | CAATCCCAATTCATCAAATATTG                                       | Mutant <i>fasX</i> allele primer    |
| Δ54R            | CAATATTTGATGAATTGGGGATTG                                      | Mutant <i>fasX</i> allele primer    |
| Δ66F            | CAATCAAATATTTTTCTCTCTCTCC                                     | Mutant <i>fasX</i> allele primer    |
| Δ66R            | GGAGAGAGAGAAAAATATTTGATTG                                     | Mutant <i>fasX</i> allele primer    |
| Δ103F           | GTATTTTTGATTGATGGCTCGGC                                       | Mutant <i>fasX</i> allele primer    |
| Δ103R           | GCCGAGCCATCAATCAAAAATAC                                       | Mutant <i>fasX</i> allele primer    |
| Δ106F           | ATTTTTGATATGTGGCTCGGCAG                                       | Mutant <i>fasX</i> allele primer    |
| Δ106R           | CTGCCGAGCCACATATCAAAAAT                                       | Mutant <i>fasX</i> allele primer    |
| Δ115F           | ATGATGGCTCGGAGACAAAATGAC                                      | Mutant <i>fasX</i> allele primer    |
| Δ115R           | GTCATTTTGTCTCCGAGCCATCAT                                      | Mutant <i>fasX</i> allele primer    |
| Δ128F           | AGACAAAATGACATGTCAGTTGTC                                      | Mutant <i>fasX</i> allele primer    |
| Δ128R           | GACAACTGACATGTCATTTTGTCT                                      | Mutant <i>fasX</i> allele primer    |
| Δ137F           | GACGATGTCAGTGTCTTTGTTTGG                                      | Mutant <i>fasX</i> allele primer    |
| Δ137R           | CCAAACAAAGACACTGACATCGTC                                      | Mutant <i>fasX</i> allele primer    |
| ZOOFASX<br>F    | GCAGATCTGAAAATGGTGATTCTTGATG<br>G                             | <i>S. zooepidemicus fasX</i> primer |
| ZOOFASX<br>R    | GCATGCATCAACGCTTGCTTGTCATGAA<br>TC                            | <i>S. zooepidemicus fasX</i> primer |
| GSP1            | CTAACTGGCTGTTATTGATAGG                                        | Gene-specific primer for <i>ska</i> |
| SKAMUT1         | GCATGGATCCACTTTGAGGACTTAGGAAT<br>TG                           | Construction of<br>2221ΔX.GCSKA     |
| SKAMUT2         | CTAAAAGTTAAGTTTCAATCGGCATTATTA<br>GAATAAC                     | Construction of<br>2221ΔX.GCSKA     |
| SKAMUT3         | GTTATTCTAATAATGCCGATTGAACTTAA<br>CTTTTAG                      | Construction of<br>2221ΔX.GCSKA     |
| SKAMUT4         | GCATGGATCCCTTGTTAAGGACGTAATA<br>TTTCTC                        | Construction of<br>2221ΔX.GCSKA     |
| FXΔ155-<br>205F | GCAGATCTCGAATTGATAAGAGTAAGCAG<br>C                            | Mutant <i>fasX</i> allele primer    |
| FXΔ155-<br>205R | GCTCTAGAAAAAACCTAACCAGAACTGG<br>TCAGGTTTGTATATCCAAACAAAGACAAC | Mutant <i>fasX</i> allele primer    |
| FXΔ1-           | GCATGCATTTGACTTTATCTACAAGGTGT                                 | Mutant <i>fasX</i> allele primer    |

|                  |                                                                            |                                                |
|------------------|----------------------------------------------------------------------------|------------------------------------------------|
| 34,115-205F      | GGCATAATGTGTGGTTCGAGCAATCAATCC<br>CCAATTC                                  |                                                |
| FXΔ1-34,115-205R | GCAGATCTAAAAAACCTAACCGAACTG<br>GTCAGGTTTCCGAGCCATCATATCAAAAA<br>TAC        | Mutant <i>fasX</i> allele primer               |
| FXC45/46 GF      | TTTATCGAGCAATCAATGGCCAATTCAAT<br>CAAAATATTG                                | Mutant <i>fasX</i> allele primer               |
| FXC45/46 GR      | CAATATTTTGATTGAATTGGCCATTGATTG<br>CTCGATAAA                                | Mutant <i>fasX</i> allele primer               |
| FXΔ72-93F        | TTCAATCAAAAATATTGTTTTCATTTTTGAT<br>ATGATG                                  | Mutant <i>fasX</i> allele primer               |
| FXΔ72-93R        | CATCATATCAAAAATGAAAACAATATTTTG<br>ATTGAA                                   | Mutant <i>fasX</i> allele primer               |
| CFVAKOF          | CAAATTTTCATCAAGCTCTAGTTCaatctaa<br>acacattgatgagcggc                       | <i>cvfA</i> mutation plasmid                   |
| CFVAKOR          | TAATTCTCCATTGACTCATTACG                                                    | <i>cvfA</i> mutation plasmid                   |
| CVFAOKF          | CAAATTTTCATCAAGCTCTAGTTCaatctaa<br>acacattgatgagcggc                       | <i>cvfA</i> control plasmid                    |
| CVFAOKR          | ATAAAGAAAAAGAGGATAATTCC                                                    | <i>cvfA</i> control plasmid                    |
| PNPAF            | CTGTTATGTCTAAGAAAATGGCAAC                                                  | <i>pnpA</i> mutation plasmid                   |
| PNPAR            | AATTGCCTGAAGGGCCCGTTTCACCAACT<br>GAATATTGC                                 | <i>pnpA</i> mutation plasmid                   |
| COMP.SK A.EX1    | CTATAAAATTATTATGTTATTCTAATAATtc<br>aatccccatcaGGGGATTGAACTTAACTTTT<br>AGG  | Complementary <i>ska</i> extension plasmid     |
| COMP.SK A.EX2    | CCTAAAAGTTAAGTTTCAATCCCCtgatggg<br>gattgaATTATTAGAATAACATAATAATTTT<br>ATAG | Complementary <i>ska</i> extension plasmid     |
| COMP.SK A.EX3    | TTTAAGGACGTAATATTTCTC                                                      | Complementary <i>ska</i> extension plasmid     |
| COMP.SK A.EX4    | TCACTTTGAGGACTTAGGAATTG                                                    | Complementary <i>ska</i> extension plasmid     |
| NCOMP.S KA.EX1   | CTATAAAATTATTATGTTATTCTAATAATct<br>cactcacatcaGGGGATTGAACTTAACTTTT<br>AGG  | Non-complementary <i>ska</i> extension plasmid |
| NCOMP.S KA.EX2   | CCTAAAAGTTAAGTTTCAATCCCCtgatgtg<br>agtgagATTATTAGAATAACATAATAATTTT<br>ATAG | Non-complementary <i>ska</i> extension plasmid |
| NCOMP.S KA.EX3   | TTTAAGGACGTAATATTTCTC                                                      | Non-complementary <i>ska</i> extension plasmid |
| NCOMP.S KA.EX4   | TCACTTTGAGGACTTAGGAATTG                                                    | Non-complementary <i>ska</i> extension plasmid |
